# Supplementary material for: Extension of the short wavelength side of fluorescent proteins using hydrated chromophores, and its application
Source: PubMed Central journal article supplement (PMC9633818; doi:10.1038/s42003-022-04153-7), 2022-11-03
Supplement: 42003_2022_4153_MOESM2_ESM.pdf [file 42003_2022_4153_MOESM2_ESM.pdf]

## Description of Additional Supplementary Files

**File name:** Supplementary Data 1

**Description:** Original data for Figs. 1a, 1b, 1c, 1d, 1e, 2b, 2d, S2a, S2b, S2c, S2d, S3b, S5a, and S5b.
